# Supplementary material for: Targeted Virome Sequencing Enhances Unbiased Detection and Genome Assembly of Known and Emerging Viruses—The Example of SARS-CoV-2
Source: MDPI journal article supplement (doi:10.3390/v14061272), 2022-06-11
Supplement: s1 [file s1]

Supplementary Table S1. Comparison of virome enrichment strategies.

|                             |                              | Total Virome Enrichment Method <sup>1</sup> |                |                 |                   |
|-----------------------------|------------------------------|---------------------------------------------|----------------|-----------------|-------------------|
|                             |                              | poly-A selection                            | ribo-depletion | DNase treatment | Target Enrichment |
| Viral Target                |                              |                                             |                |                 |                   |
|                             | viral genome - DNA           | -                                           | +              | -               | +                 |
|                             | viral genome - RNA -strand   | -                                           | +              | +               | +                 |
|                             | viral genome - RNA +stand    | +                                           | +              | +               | +                 |
|                             | viral transcripts -polyA     | +                                           | +              | +               | +                 |
|                             | viral transcripts -non polyA | -                                           | +              | +               | +                 |
| Background NAs <sup>2</sup> |                              |                                             |                |                 |                   |
|                             | Human gDNA                   | -                                           | +              | -               | -                 |
|                             | Human rRNA                   | -                                           | -              | +               | -                 |
|                             | Human mRNA                   | +                                           | +              | +               | -                 |
|                             | bacterial gDNA               | -                                           | +              | -               | -                 |
|                             | bacterial rRNA               | -                                           | +              | +               | -                 |
|                             | bacterial mRNA               | -                                           | +              | +               | -                 |

<sup>1</sup> Plus (+) indicates the substantial presence of the genomic material in the final NGS library.

<sup>2</sup> Major sources of background genomic material in a clinical specimen. Other sources like mitochondrial transcripts, miRNAs, long-non-coding RNAs, other microorganisms and parasites etc. are omitted.
