# Supplementary figures and images for: Targeted Virome Sequencing Enhances Unbiased Detection and Genome Assembly of Known and Emerging Viruses—The Example of SARS-CoV-2
Source: MDPI journal article supplement (doi:10.3390/v14061272), 2022-06-11

## Illumina

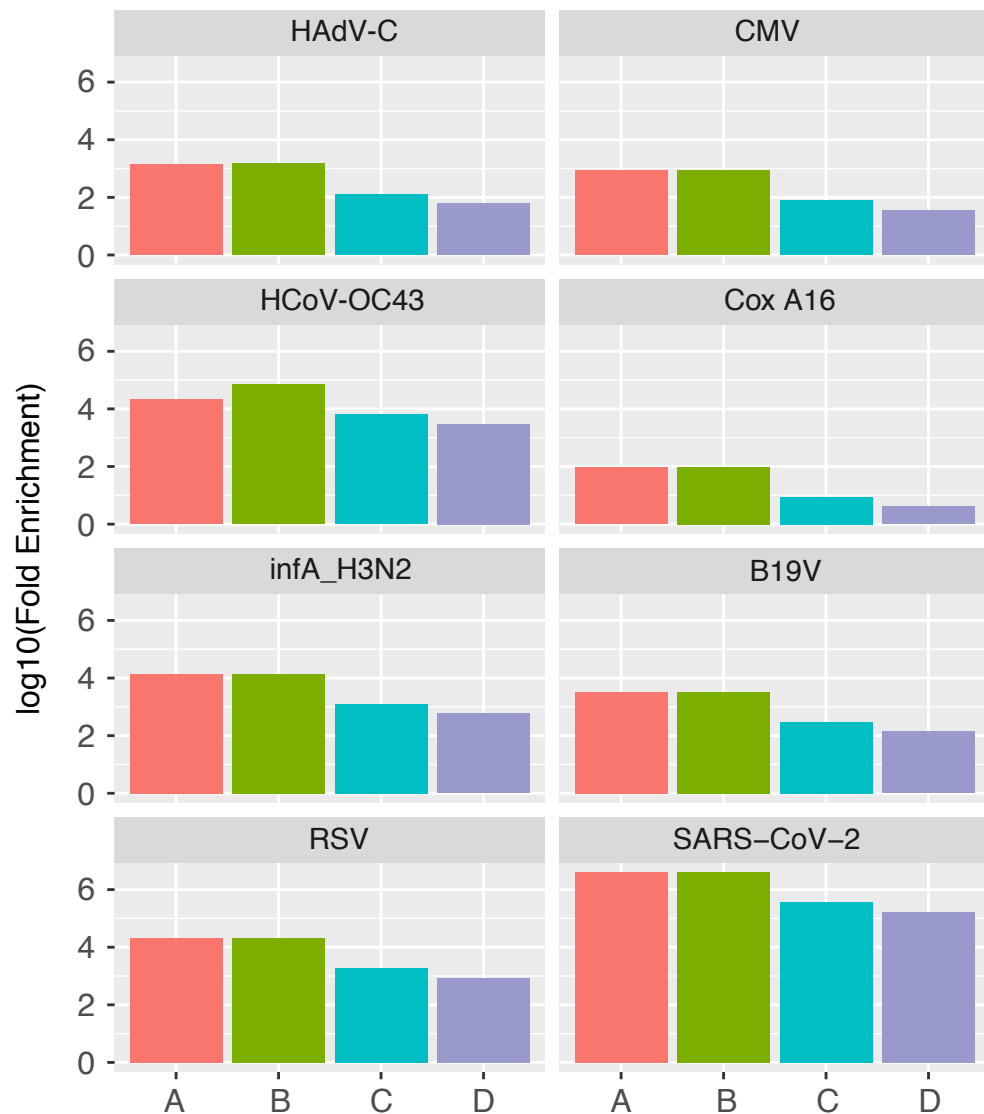

## MinION

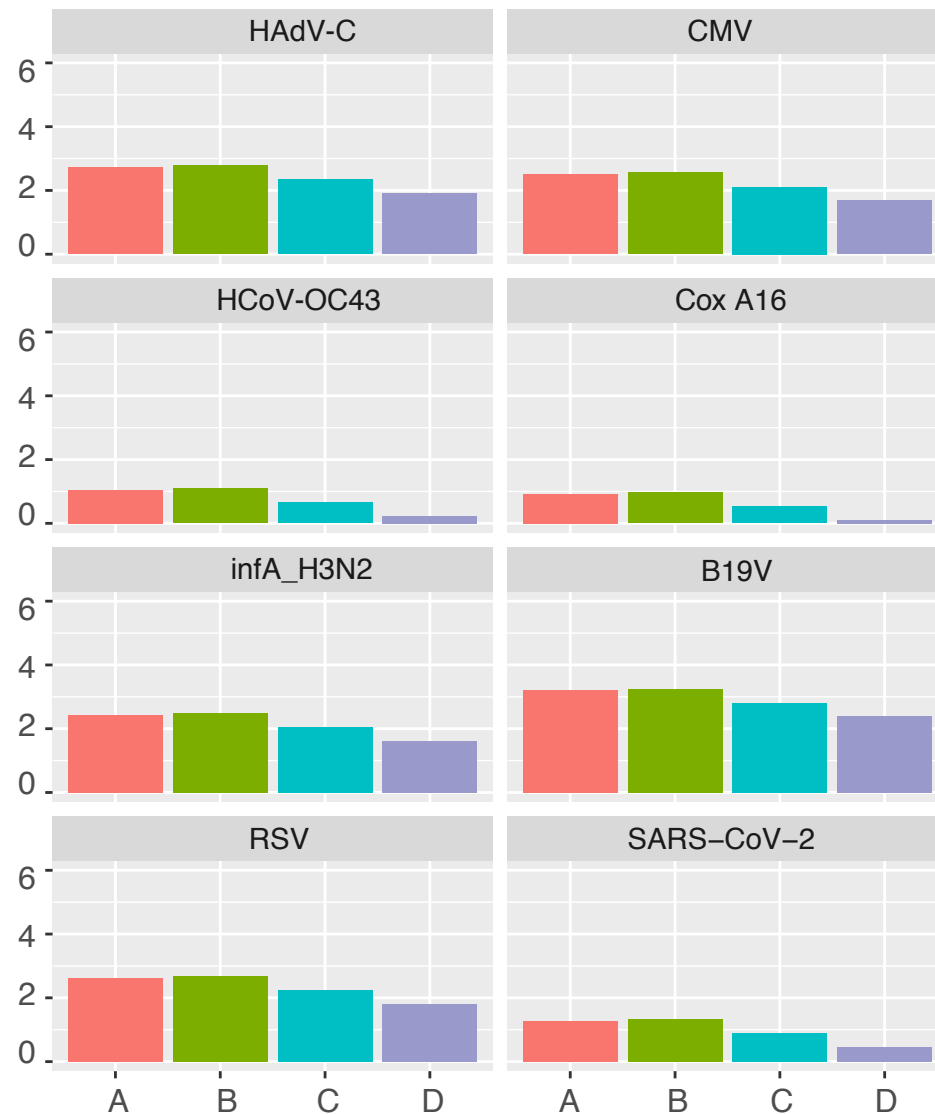

key

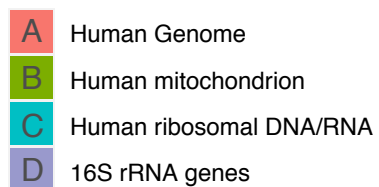

Supplement: s1 [file s1]
